# Supplementary material for: Depletion of B cell-activating factor attenuates hepatic fat accumulation in a murine model of nonalcoholic fatty liver disease
Source: PubMed Central journal article supplement (PMC6353938; doi:10.1038/s41598-018-37403-y), 2019-01-30
Supplement: 41598_2018_37403_MOESM1_ESM.pdf [file 41598_2018_37403_MOESM1_ESM.pdf]

## **Supplementary Information**

### **Depletion of B cell-activating factor attenuates hepatic fat accumulation in a murine model of nonalcoholic fatty liver disease**

Yoshiko Nakamura, Masanori Abe, Keitarou Kawasaki, Teruki Miyake, Takao Watanabe,

Osamu Yoshida, Masashi Hirooka, Bunzo Matsuura, Yoichi Hiasa

**Table S1. Oligonucleotide sequences and annealing temperatures for quantitative real-time****PCR.**

| Gene           | GenBank Accession No.  | Sequence<br>(5'-forward-3'<br>5'-reverse-3')            | Location                   | Annealing Temperature (°C) |
|----------------|------------------------|---------------------------------------------------------|----------------------------|----------------------------|
| HPRT1          | NM_013556              | tctctcagaccgcttt<br>cctggttcatcatcgtaac                 | nt104–122<br>nt173–193     | 60                         |
| F4/80          | NM_010130              | agtacgatgtgggctttg<br>ccccatctgtacatcccact              | nt35–54<br>nt77–96         | 60                         |
| CD11c          | NM_021334              | atggagcctaagacaggac<br>ggatctgggatgctgaaac              | nt1725–1744<br>nt1768–1787 | 60                         |
| TNF- $\alpha$  | NM_013693              | tcttctattctgcttggg<br>ggctctgggcatagaactga              | nt260–280<br>nt368–387     | 60                         |
| CD36           | NM_016741              | cgtctaccacccaacga<br>agaaacagaggcgacca                  | nt1148–1165<br>nt1220–1237 | 65                         |
| SREBP-1c       | ENSMUST0000<br>0144942 | catggattgcacattgaaga<br>cgggaagtcactgtcttgg             | nt111–131<br>nt152–171     | 65                         |
| FAS            | NM_007988              | gctgctgttgaagtcagc<br>agtgttcgtctcggagtg                | nt767–785<br>nt823–842     | 70                         |
| ACC            | NM_133360              | gcgctgggtagatccagtt<br>ctcagtggggcttagctctg             | nt6434–6452<br>nt6484–6503 | 60                         |
| SCD-1          | NM_009127              | tccctcctgcaagctctac<br>cagagcgtggtcatgtagt              | nt566–585<br>nt608–627     | 60                         |
| ACS            | NM_007981              | aaagatggctggttacacagc<br>cgataatctcaaggtgccatt          | nt1818–1838<br>nt1863–1884 | 57                         |
| CD36           | NM_001159555           | ttgtacctatactgtggctaaatgaga<br>cttgtgttttgaacatttctgctt | nt1689–1715<br>nt1737–1760 | 57                         |
| MTP            | NM_008642              | tgtcagaatgaaggctgcaa<br>agtctcccaggatcagctt             | nt1395–1414<br>nt1440–1459 | 60                         |
| TGF- $\beta$ 1 | NM_011577              | tggagcaacatgtggaactc<br>cagcagccggttaccagg              | nt1358–1377<br>nt1411–1428 | 60                         |
| IL-6           | NM_031168              | acaaccacggccttccctactt<br>cacgatttcccagagaacatgtg       | nt92–113<br>nt198–220      | 63                         |
| IL-1 $\beta$   | NM_008361              | ttgacggacccaaaagat<br>agctggatgctctcatcagg              | nt142–160<br>nt195–214     | 60                         |
| IL-10          | NM_010548              | ggttgccaagccttatcgga<br>acctgctccactgccttct             | nt302–321<br>nt473–492     | 63                         |
| IL-18          | NM_008360              | gacaacacgcttactttatacctga<br>cagtgaagtcggccaaagt        | nt73–84<br>nt99–112        | 70                         |
| MCP-1          | NM_011333              | catccacgtgttgctca<br>gatcatcttctggtgaatgagt             | nt139–56<br>nt192–214      | 70                         |

|               |                   |                                                 |                            |    |
|---------------|-------------------|-------------------------------------------------|----------------------------|----|
| Resistin      | ENSMUST0000012849 | tgccagtgtgcaaggataga<br>tggaaaccacgctcacttc     | nt367–386<br>nt437–455     | 70 |
| Adiponectin   | NM_009605         | ggagagaaaggagatgcaggt<br>ctttcctgccaggggttc     | nt319–339<br>nt410–427     | 67 |
| $\alpha$ -SMA | NM_007392         | cccaccagagtggagaa<br>acatagctggagcagcgtct       | nt9–26<br>nt55–74          | 65 |
| Col-1a1       | NM_007742         | caggcaagcctggtgaac<br>aacctctctgcctcttgc        | nt2030–2047<br>nt2089–2107 | 65 |
| Col-1a2       | NM_007743         | gctgctcagtattctgacaaagg<br>cctctgggtcccattaaacc | nt393–415<br>nt441–460     | 65 |
| CD206         | NM_008625.2       | ggtctatggaaccacggatg<br>tgcattgccagtaaggagt     | nt519–538<br>nt569–588     | 63 |
| Arg1          | NM_007482.3       | gtctgtggggaagccaat<br>cttccaactgccagactgtg      | nt315–333<br>nt403–422     | 60 |

HPRT1: hypoxanthine phosphoribosyltransferase 1, TNF: tumour necrosis factor; SREBP: sterol regulatory element-binding protein; FAS: fatty acid synthase; ACC: acetyl-CoA carboxylase; SCD: stearoyl-CoA desaturase; ACS: acyl-CoA synthetase, MTP: microsomal triglyceride transfer protein; TGF: transforming growth factor; IL: interleukin; MCP-1: monocyte chemoattractant protein-1, SMA: smooth muscle actin, Col: collagen, Arg1: arginase 1

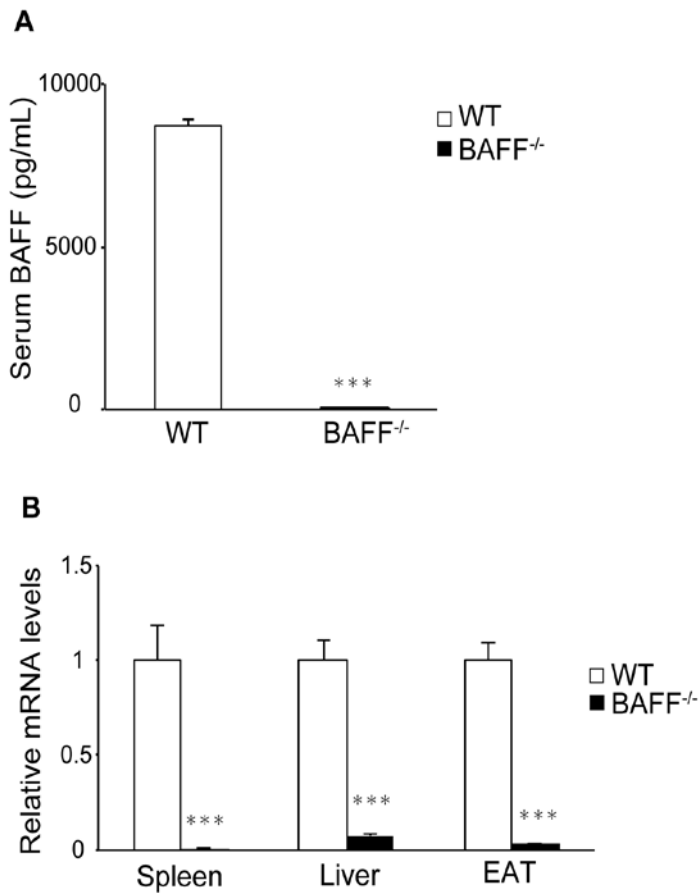

**Supplementary Fig. S1. Verification of *BAFF* knockout.** *BAFF* knockout was confirmed by

(A) measurement of serum BAFF concentrations ( $n = 6$ ) and (B) real-time PCR for quantitation of *BAFF* levels in samples from spleens, livers, and EAT ( $n = 8$ ). *BAFF*<sup>-/-</sup> and C57BL/6J mice were fed an ND for 18 weeks. Data represent the mean  $\pm$  SEM. \*\*\* $P < 0.001$ , Mann–Whitney  $U$  test.

BAFF, B cell-activating factor; EAT, epididymal adipose tissue; ND, normal diet.

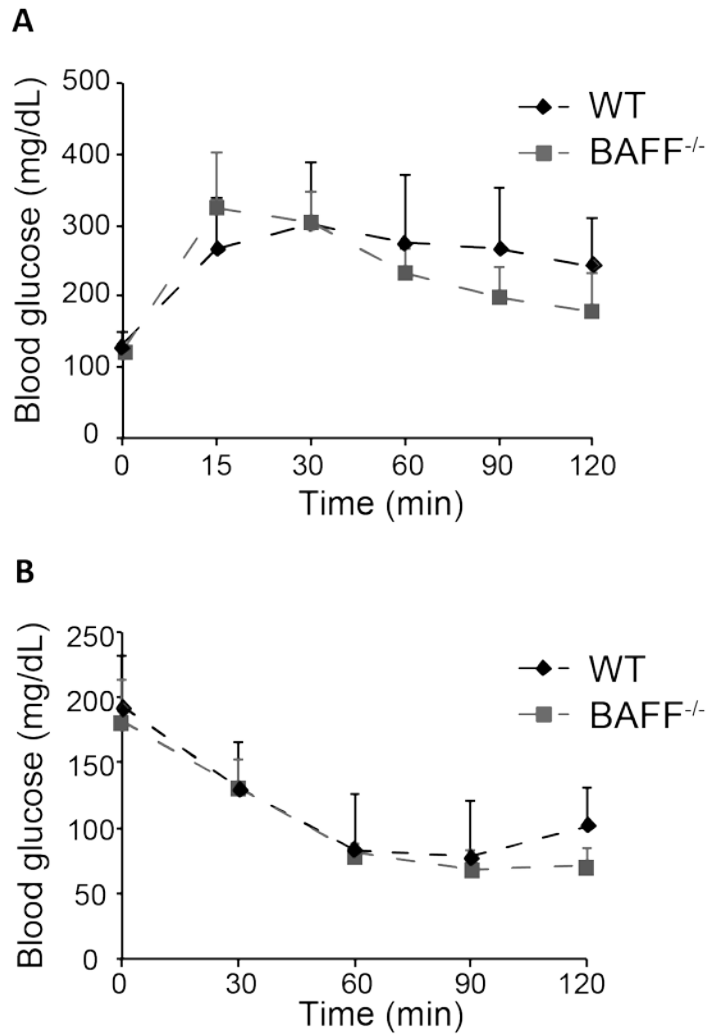

**Supplementary Fig S2. Insulin sensitivity in *BAFF*<sup>-/-</sup> mice fed with an ND**

(A) Glucose- and (B) insulin-tolerance tests in ND-fed WT and *BAFF*<sup>-/-</sup> mice ( $n = 5/\text{group}$ ). For

all bar plots, data are expressed as the mean  $\pm$  SD.

BAFF, B cell-activating factor; ND, normal diet; WT, wild-type

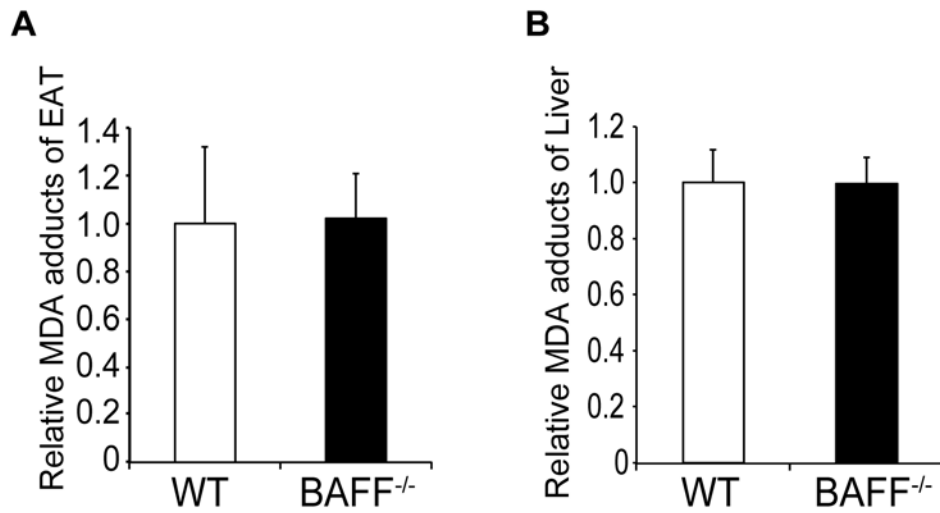

**Supplementary Fig. 3 MDA adduct levels in the EAT and liver**

MDA adduct levels of lysate of (A) EAT and (B) liver from *BAFF*<sup>-/-</sup> and WT mice fed with an HFD for 24 weeks, were estimated by ELISA ( $n = 7$ /group). Data are expressed as the mean  $\pm$  SD and expressed as a ratio to values obtained for the WT mice.

MDA, malondialdehyde; BAFF, B cell-activating factor; EAT, epididymal adipose tissue; ND, HFD, high-fat diet; WT, wild-type

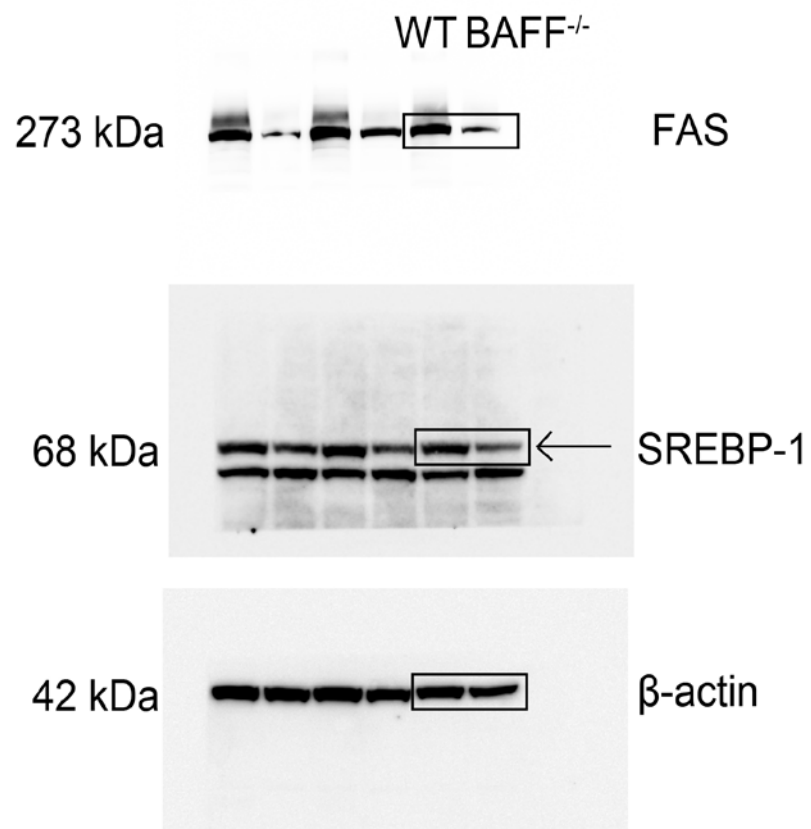

**Supplementary Fig. S4. Original blots for Figure 6B.**
